# Supplementary material
Source: MDPI journal article supplement (https://www.mdpi.com/2311-7524/9/12/1349)
Supplement: s1 [file s1]

**Table S1 Primer sequences used for qRT-PCR amplification**

| <b>Gene ID</b>   | <b>Forward primer</b>     | <b>Reverse primer</b>     |
|------------------|---------------------------|---------------------------|
| <i>BcAction</i>  | GAATCCACGAGACGACTTACAAC   | CCTTAATCTTCATGCTGCTTGGT   |
| <i>BcGA3ox2</i>  | TGGCAGCGAAGTTGATGTGGTTAG  | CTCGGTCTGGTTCTGGGCATATTG  |
| <i>BcGA20ox2</i> | CCTTCCATTGACATTCCCGTGCTC  | ACTCGCTGACTCCATGATTGACAAC |
| <i>BcCO</i>      | CATGCTGACTCCGCCTACTTATGC  | CACGCTCACATGACTCGCAGAC    |
| <i>BcFT</i>      | GTGGTAGGGAGAGTTGTAGGAGACG | TGGCTTGTTGAGAACTTGAGAAGGC |
| <i>BcSOC1</i>    | GCTCGCTGAAAAGTGGGGATCTC   | GGGCTACTGTCCTCGTCACCTC    |
| <i>BcEXPA10</i>  | GGTTCAAGAACAGGTTGGCAAGC   | GAAGGAGCGGCGTTGTAGGAG     |
| <i>BcXTH4</i>    | TGCACCCTTCATAGCTTCCTACAG  | GCATCAAGGTCACGGAAC TCATTC |
